# Supplementary material
Source: PubMed Central journal article supplement (PMC7960172)
Supplement: 15-00409.pdf [file 15-00409.pdf]

**On-line Table 1: Clinical EEG and brain imaging of patients with drug-resistant and drug-sensitive epilepsy**

| Patient No.                    | Sex, Age (yr) | Syndrome | Duration of Epilepsy (yr) | Average Seizure Frequency (mo) | Anti-Epileptic Drugs | Video EEG Monitoring                                        | Brain MRI                                                          | Ictal SPECT                                                 | Interictal SPECT | FDG-PET                                      |
|--------------------------------|---------------|----------|---------------------------|--------------------------------|----------------------|-------------------------------------------------------------|--------------------------------------------------------------------|-------------------------------------------------------------|------------------|----------------------------------------------|
| <b>Drug-resistant epilepsy</b> |               |          |                           |                                |                      |                                                             |                                                                    |                                                             |                  |                                              |
| 1                              | M, 44         | TLE      | 34                        | 1                              | CBZ, TPM, VPA, PB    | Lt. lateral TLE                                             | Cerebro-malacic changes at the right cuneus and left lingual gyrus | NA                                                          | NA               | Normal                                       |
| 2                              | F, 52         | TLE      | 42                        | 2                              | CBZ, VPA, LEV        | Lt. lateral TLE                                             | Atrophic change, left temporal lobe                                | NA                                                          | NA               | NA                                           |
| 3                              | F, 29         | TLE      | 5                         | 0.5                            | LEV, OXC, LMT        | Lt. lateral TLE                                             | Normal                                                             | NA                                                          | NA               | Hypometabolism in left temporal lobe         |
| 4                              | M, 43         | TLE      | 37                        | 30                             | CBZ, VPA, LEV, TPM   | Rt. medial TLE                                              | Hippocampal sclerosis, Rt.                                         | NA                                                          | NA               | Hypometabolism in right temporal lobe        |
| 5                              | F, 29         | TLE      | 12                        | 0.2                            | LEV, CBZ             | Rt. medial TLE                                              | Hippocampal sclerosis, Rt.                                         | NA                                                          | NA               | Hypometabolism in right temporal lobe        |
| 6                              | F, 26         | FLE      | 15                        | 30                             | VPA, CBZ, TPM, PB    | No localization, suspicious Rt. FLE (considering semiology) | Lesionectomy in the right high parietal cortex                     | Hyperperfusion in the right posterior-inferior frontal lobe | NA               | NA                                           |
| <b>Drug-sensitive epilepsy</b> |               |          |                           |                                |                      |                                                             |                                                                    |                                                             |                  |                                              |
| 7                              | F, 53         | TLE      | 3                         | 0                              | LEV                  | Rt. medial TLE                                              | Normal                                                             | NA                                                          | NA               | Hypometabolism in right medial temporal lobe |
| 8                              | M, 21         | TLE      | 4                         | 0                              | VPA, ZNS, LEV        | Lt. medial TLE                                              | Hippocampal sclerosis                                              | NA                                                          | NA               | NA                                           |
| 9                              | M, 18         | TLE      | 4                         | 0                              | LEV, OXC             | Lt. lateral TLE                                             | Normal                                                             | NA                                                          | NA               | NA                                           |
| 10                             | M, 18         | TLE      | 1                         | 0                              | LEV                  | Lt. lateral TLE                                             | Normal                                                             | NA                                                          | NA               | NA                                           |
| 11                             | M, 18         | FLE      | 1                         | 0                              | LEV                  | Lt. FLE                                                     | Normal                                                             | NA                                                          | NA               | NA                                           |

**Note:**—FLE indicates frontal lobe epilepsy; LEV, levetiracetam; OXC, oxcarbazepine; VPA, valproic acid; ZNS, zonisamide; CBZ, carbamazepine; TPM, topiramate; PB, phenobarbital; LMT, lamotrigine; NA, not applicable; EEG, electroencephalography; Rt., right; Lt., left.

**On-line Table 2: Volume of hippocampal regions in healthy controls and patients with temporal lobe epilepsy**

|                                      | Lt. Hippocampus (mm <sup>3</sup> ) | Rt. Hippocampus (mm <sup>3</sup> ) |
|--------------------------------------|------------------------------------|------------------------------------|
| Healthy control subjects             |                                    |                                    |
| 1                                    | 13520                              | 10504                              |
| 2                                    | 12928                              | 9664                               |
| 3                                    | 12832                              | 9880                               |
| 4                                    | 13296                              | 10448                              |
| 5                                    | 13160                              | 10440                              |
| 6                                    | 13808                              | 10720                              |
| 7                                    | 12928                              | 9664                               |
| 8                                    | 13848                              | 10616                              |
| Patients with temporal lobe epilepsy |                                    |                                    |
| 1                                    | 11872                              | 9008                               |
| 2                                    | 11896                              | 9120                               |
| 3                                    | 13360                              | 9920                               |
| 4                                    | 12184                              | 9400                               |
| 5                                    | 13408                              | 10464                              |
| 8                                    | 12768                              | 10152                              |
| 9                                    | 13160                              | 10040                              |
| 10                                   | 13656                              | 10896                              |

Note:—Lt. indicates left; Rt., right.

**On-line Table 3: Radioactivity in whole-brain (SUV) and ABCB1 genotype**

| No. of Subjects         | Radioactivity in Whole Brain (SUV) | ABCB1 (MDR1)       |                      |                    |
|-------------------------|------------------------------------|--------------------|----------------------|--------------------|
|                         |                                    | 1236 C>T rs1128503 | 2677 G>T,A rs2032582 | 3435 C>T rs2032582 |
| Healthy controls        |                                    |                    |                      |                    |
| 1                       | 0.47883                            | CT                 | GA                   | CC                 |
| 2                       | 0.53917                            | CT                 | GT                   | CT                 |
| 3                       | 0.36889                            | TT                 | TT                   | CT                 |
| 4                       | 0.45964                            | CT                 | AA                   | CC                 |
| 5                       | 0.52468                            | CT                 | GG                   | CC                 |
| 7                       | 0.43680                            | CT                 | TA                   | CT                 |
| Drug-resistant epilepsy |                                    |                    |                      |                    |
| 2                       | 0.78392                            | CT                 | TA                   | CT                 |
| 4                       | 0.62644                            | CT                 | GT                   | CT                 |
| 6                       | 0.34171                            | CT                 | GT                   | CT                 |
| Drug-sensitive epilepsy |                                    |                    |                      |                    |
| 9                       | 0.46978                            | CT                 | GG                   | CC                 |
| 11                      | 0.41311                            | TT                 | GT                   | CT                 |

Note:—MDR1 indicates Multiple Drug Resistance List of Bad Medications.

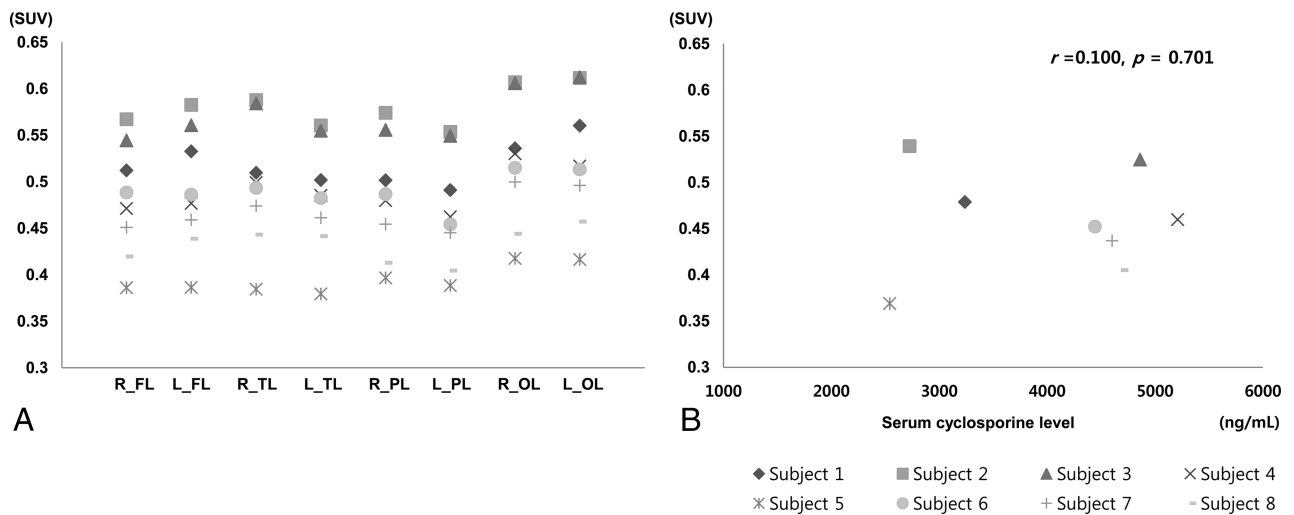

**ON-LINE FIG 1.** A, Radioactivity of the whole brain in healthy participants and regional distributions of radio uptake. B, Relationship between the radioactivity of the whole brain and the serum concentration of CS ( $r = 0.100, P = .701$ ).

**On-line Table 4: Comparison of AIs in temporal structures among healthy subjects and patients with drug-sensitive and drug-resistant lateral and medial temporal lobe epilepsy**

| Variables/Pt. No.              | Superior Temporal Gyrus | Middle Temporal Gyrus | Inferior Temporal Gyrus | Hippocampus      | Parahippocampus | Amygdala         | P Value |
|--------------------------------|-------------------------|-----------------------|-------------------------|------------------|-----------------|------------------|---------|
| Healthy subjects (mean)        | 3.7592 ± 2.7825         | 0.4077 ± 3.0872       | 6.4996 ± 5.9187         | 10.4621 ± 4.9800 | 3.0562 ± 4.7347 | 7.3099 ± 10.5752 |         |
| Drug-resistant epilepsy        |                         |                       |                         |                  |                 |                  |         |
| Lateral temporal lobe epilepsy |                         |                       |                         |                  |                 |                  |         |
| 1                              | 12.02109                | 6.194027              | 2.514667                | 6.6514           | 2.0533          | 0.6077           | .776    |
| 2                              | 26.49111                | 9.529195              | -13.9591                | 6.1304           | 1.0569          | 12.0481          |         |
| 3                              | 6.689632                | 6.20482               | 7.891523                | 9.3431           | 5.3695          | 15.3958          |         |
| Medial temporal lobe epilepsy  |                         |                       |                         |                  |                 |                  |         |
| 4                              | -2.26316                | -2.6759               | 3.066575                | -2.3718          | -1.3807         | -5.9779          | .267    |
| 5                              | 2.726637                | -3.68332              | -8.16219                | -6.2177          | 2.5178          | 1.2254           |         |
| Drug-sensitive epilepsy        |                         |                       |                         |                  |                 |                  |         |
| Lateral temporal lobe epilepsy |                         |                       |                         |                  |                 |                  |         |
| 9                              | 5.3757                  | 0.9214                | 5.9762                  | 1.2332           | -2.9354         | -5.5809          | .267    |
| 10                             | 5.2332                  | 0.9663                | -3.4403                 | 14.6596          | 5.8813          | 4.7310           |         |
| Medial temporal lobe epilepsy  |                         |                       |                         |                  |                 |                  |         |
| 8                              | 4.6689                  | 1.2125                | 1.5589                  | 2.3679           | -2.2080         | 7.7990           |         |

**Note:**—Pt. indicates patient.
